# 1 **Can we sort states of environmental DNA (eDNA) from a single sample?**

2 Anish Kirtane<sup>1</sup>, Hannah Kleyer<sup>1</sup> and Kristy Deiner<sup>1</sup>

3 <sup>1</sup>Institute of Biogeochemistry and Pollutant Dynamics, Eidgenössische Technische  
4 Hochschule Zürich, Zürich, Switzerland

5

## 6 **Abstract**

7 Environmental DNA (eDNA) once shed can exist in numerous states with varying behaviors  
8 including degradation rates and transport potential. In this study we consider three states of  
9 eDNA: 1) a membrane-bound state referring to DNA enveloped in a cellular or organellar  
10 membrane, 2) a dissolved state defined as the extracellular DNA molecule in the environment  
11 without any interaction with other particles, and 3) an adsorbed state defined as extracellular  
12 DNA adsorbed to a particle surface in the environment. Capturing, isolating, and analyzing a  
13 target state of eDNA provides utility for better interpretation of eDNA degradation rates and  
14 transport potential. While methods for separating different states of DNA have been  
15 developed, they remain poorly evaluated due to the lack of state-controlled experimentation.  
16 We evaluated the methods for separating states of eDNA from a single sample by spiking  
17 DNA from three different species to represent the three states of eDNA as state-specific  
18 controls. We used chicken DNA to represent the dissolved state, cultured mouse cells for the  
19 membrane-bound state, and salmon DNA adsorbed to clay particles as the adsorbed state. We  
20 performed the separation in three water matrices, two environmental and one synthetic, spiked  
21 with the three eDNA states. The membrane-bound state was the only state that was isolated  
22 with minimal contamination from non-target states. The membrane-bound state also had the  
23 highest recovery ( $54.11 \pm 19.24$  %), followed by the adsorbed state ( $5.08 \pm 2.28$  %), and the  
24 dissolved state had the lowest total recovery ( $2.21 \pm 2.36$  %). This study highlights the  
25 potential to sort the states of eDNA from a single sample and independently analyze them for  
26 more informed biodiversity assessments. However, further method development is needed to  
27 improve recovery and reduce cross-contamination.

## 28 **1. Introduction**

29 Environmental DNA (eDNA) is DNA that can be extracted from environmental samples such  
30 as water, soil, or air without first isolating any target organisms (Taberlet et al., 2012).  
31 Environmental DNA is expected to be a complex mixture of DNA from many organisms and  
32 potentially reside in different states due to the many sources from which eDNA can arise  
33 (e.g., mucus, tissues, whole single-celled organisms, etc; (Mauvisseau et al., 2022; Rodriguez-  
34 Ezpeleta et al., 2021). Environmental DNA encapsulated within a cell or organelle (e.g.,  
35 nucleus or mitochondria) is considered to be membrane-bound DNA (Mauvisseau et al.,  
36 2022; Nagler et al., 2022). After membrane lysis, the DNA becomes extracellular and can be  
37 further categorized into two states when in water; dissolved DNA having no interactions with  
38 other particles and adsorbed DNA referring to DNA chemically or physically bound to  
39 particles (Mauvisseau et al., 2022; Nagler et al., 2022). Thus, at a minimum, eDNA from  
40 environmental samples is likely to exist in at least three states (i.e., membrane-bound,  
41 dissolved, or adsorbed) at any given time from any species across the tree of life.

42 The analysis of eDNA without considering the existence of these different states has been  
43 useful in biodiversity monitoring and conservation applications, but there is a recent shift to

44 consider the states of eDNA to improve knowledge on its persistence and transport in the  
45 environment (Mauvisseau et al., 2022; Nagler et al., 2022). Understanding the ecology of  
46 eDNA states can also aid in overcoming challenges associated with eDNA analysis such as  
47 confirming the current occupancy or relative abundance of surveyed biodiversity (Deiner et  
48 al., 2017; Mauvisseau et al., 2022; Nagler et al., 2022). This is because the detection  
49 probability of a species' eDNA in the environment is dependent on its production rate,  
50 degradation rate, and transport rate from the source (Barnes & Turner, 2016). For example, a  
51 rapid eDNA degradation rate can lead to false negative detection inference for a species'  
52 presence (i.e., the eDNA disappears faster than it can be sampled, but the species is present in  
53 the habitat). While a slow eDNA degradation rate can increase persistence and lead to a false  
54 positive inference of the species' presence when in fact it is no longer in the habitat. The  
55 degradation rate of eDNA is thus a pivotal parameter to measure and understand its behavior  
56 across environmental conditions since the rate change alone can lead to false interpretations of  
57 the presence of a species.

58 The degradation rate of eDNA is hypothesized to be governed by several factors including  
59 extracellular nucleases secreted by microorganisms, which are themselves influenced by  
60 abiotic conditions like temperature, pH, and light irradiation (Barnes & Turner, 2016;  
61 Harrison et al., 2019; Lamb et al., 2022). The rate of degradation has recently been  
62 hypothesized to be influenced by the state of eDNA as well (Barnes & Turner, 2016; Harrison  
63 et al., 2019; Mauvisseau et al., 2022; Nagler et al., 2022). For instance, membrane-bound  
64 DNA may remain protected from extracellular enzymatic degradation, while dissolved DNA  
65 may be more susceptible to degradation without the protection of its cellular and organellar  
66 membrane (Torti et al., 2015). Similarly, numerous studies demonstrate that adsorbed DNA  
67 can remain protected from degradation for hundreds of years (Barrenechea Angeles et al.,  
68 2023; Cai et al., 2006b; Capo et al., 2021; Demanèche et al., 2001).

69 The state of the eDNA has a direct impact also on its transport potential in the environment.  
70 For example, eDNA states with different sizes and settling velocities will impact their  
71 transport distance (Jo & Yamanaka, 2022; Pont et al., 2018). Pont et al. (2018) found that  
72 eDNA in rivers behaves similarly to Fine Particulate Organic Matter (FPOM) and the settling  
73 velocity i.e. vertical transfer of eDNA is the primary predictor of eDNA downstream transport  
74 distance. But it is also likely that different states of eDNA have different properties affecting  
75 their transport (Barnes & Turner, 2016). For example, membrane-bound DNA and adsorbed  
76 DNA may exhibit higher settling velocities compared with dissolved DNA, resulting in lower  
77 transport potential of these two sources in rivers or higher settling velocities from the surface  
78 waters in lentic systems such as lakes (Jo & Yamanaka, 2022). Thus, particle behavior may  
79 also be influenced by water body type as well.

80 Isolation and independent analysis of a chosen eDNA state may be desirable for various  
81 applications. For instance, to estimate current occupancy, adsorbed DNA or dissolved DNA  
82 may not be fully reliable as these pools may remain protected in their adsorbed state, can  
83 resuspend and contribute to the eDNA collected in a water sample (Shogren et al., 2017;  
84 Turner et al., 2015). Investigating the current occupancy of species might thus consider a  
85 membrane-bound eDNA state as the most appropriate target state. Conversely, an application  
86 such as total biodiversity estimation requires high-resolution sampling both temporally and  
87 spatially. However, adsorbed DNA pools may represent information on diversity beyond  
88 current or seasonal occupancy due to the passive collection and protection of eDNA over time

89 in the adsorbed state (Cai et al., 2006b; Kirtane et al., 2019; Sakata et al., 2020; Turner et al.,  
90 2015).

91 However, the hypotheses that predict the decay and transport behavior of individual eDNA  
92 states have not been empirically tested. This is because of the lack of methods to isolate and  
93 independently analyze the persistence and transport of individual eDNA states. A small  
94 fraction of studies have attempted to separate states of eDNA from a pool of total eDNA for  
95 independent analysis of each (Corinaldesi et al., 2005; Lever et al., 2015; Yuan et al., 2019).  
96 Corinaldesi et al. (2005), utilized extraction methods to separate microbial extracellular DNA  
97 from membrane-bound DNA from the same marine sediment sample. Yuan et al. (2019),  
98 separated adsorbed, membrane-bound, and dissolved states of eDNA to investigate the  
99 distribution of antimicrobial resistance genes in wastewater. Lever et al. (2015), investigated  
100 the performance of various methods and protocols to isolate prokaryotic DNA from different  
101 states in the water column, soil, and sediment. All these studies relied on a few key sample  
102 processing principles: 1) preventing unintentional cell lysis of membrane-bound DNA; 2)  
103 prevention of adsorption of dissolved DNA to particles; 3) causing desorption of adsorbed  
104 DNA; 4) size sorting to fractionate dissolved DNA away from adsorbed DNA and membrane-  
105 bound DNA, 5) desorption of adsorbed DNA with subsequent separation of this newly  
106 desorbed DNA from membrane-bound DNA.

107 Generally, dissolved DNA is separated from the total eDNA pool via membrane filtration  
108 (Figure 1). This involves passing a water sample through a fine pore size filter (usually ~0.2  
109  $\mu\text{m}$ ) which should allow dissolved DNA to pass through into the filtrate, while membrane-  
110 bound DNA and adsorbed DNA remains on the filter material (Barnes & Turner, 2016; Lever  
111 et al., 2015; Sassoubre et al., 2016). Once dissolved DNA is separated using this method into  
112 the filtrate, it is concentrated and purified making it suitable for downstream molecular  
113 analysis. Ethanol precipitation (Figure 1) is one of the most commonly used methods for  
114 extracting dissolved DNA (Lever et al., 2015). The separation of adsorbed DNA from  
115 membrane-bound DNA remaining on the filter membrane requires the desorption of adsorbed  
116 DNA while minimizing membrane lysis in the process. In the case of adsorbed DNA, the  
117 sugar-phosphate backbone is likely covalently bound to hydroxyl groups on particle surfaces  
118 such as clay to create chemically adsorbed DNA (Mauvisseau et al., 2022). This can be  
119 reversed using phosphate-containing buffers at high pH (Figure 1) (Lever et al., 2015;  
120 Mauvisseau et al., 2022; Yuan et al., 2019). Once the formerly adsorbed DNA is desorbed it is  
121 expected to go into solution and become dissolved DNA. It can then be separated from the  
122 still intact membrane-bound DNA via filtration as before or centrifugation to cause the  
123 membrane-bound DNA to form a pellet and the supernatant transferred to remove the newly  
124 desorbed DNA. The remaining membrane-bound DNA can then be isolated and purified using  
125 membrane lysis and purification steps for downstream molecular analysis (Figure 1) (Lever et  
126 al., 2015). Following these methods sequentially suggests that it may be possible to isolate  
127 and study the different eDNA states from the same water sample.

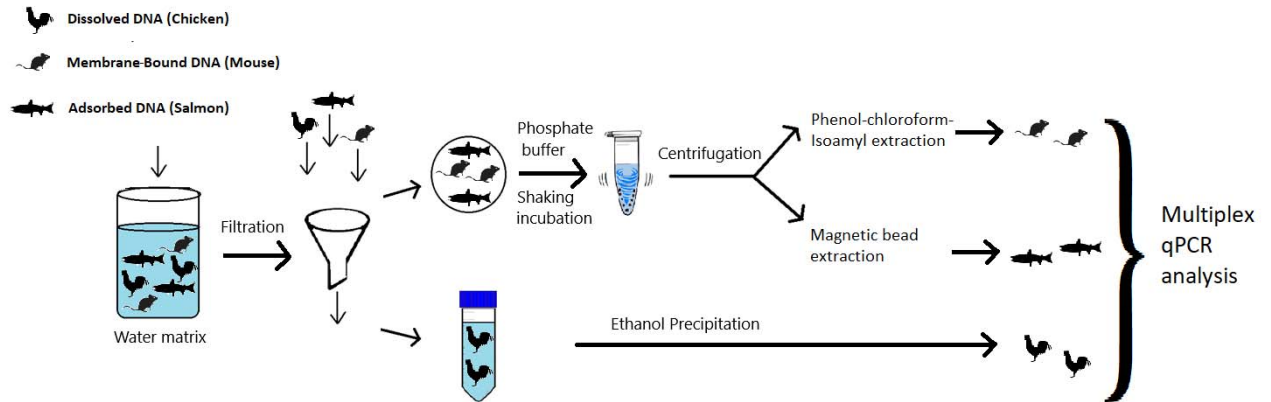

128

129 Figure 1: Experimental workflow to isolate eDNA states. Chicken DNA was spiked in the  
130 dissolved state, mouse cells were spiked to represent the membrane-bound DNA, and salmon  
131 DNA bound to clay was spiked as the adsorbed state.

132

133 In this study, we evaluated whether a single protocol can effectively isolate and have a high  
134 recovery of different states of eDNA. If successful, this method would result in the ability to  
135 separately analyze the community composition measured from each state of eDNA from a  
136 single sample. We used species-specific state-controlled spikes where each species  
137 represented one state of eDNA (Figure 1). Chicken DNA, mouse cells, and salmon DNA  
138 bound to clay particles were used as proxies for dissolved, membrane-bound, and adsorbed  
139 DNA states respectively. The separation method consisted of using a 0.22  $\mu\text{m}$  filtration  
140 membrane to isolate dissolved DNA from membrane-bound and adsorbed DNA. The filter  
141 membrane then was treated with a phosphate buffer to isolate adsorbed DNA from  
142 membrane-bound DNA. DNA for each state was recovered by performing ethanol  
143 precipitation, phenol-chloroform-isoamyl extraction, and magnetic bead extraction methods to  
144 recover dissolved, membrane-bound, and adsorbed states respectively. This experiment  
145 permitted the evaluation of two parameters of interest for eDNA state-sorting: 1) state-specific  
146 isolation and 2) state-specific recovery. State-specific DNA isolation is evaluated based on the  
147 presence of a non-target DNA state in a protocol designed to result in a given target state of  
148 eDNA. State-specific DNA recovery is used to evaluate the efficiency of a DNA extraction  
149 protocol to recover the target eDNA state relative to the spike. The ideal state-specific  
150 extraction method should have low contamination from non-target states and high DNA  
151 recovery. Furthermore, we investigated the effect of water chemistry on state sorting by  
152 replicating the experiment in different water matrices. Lastly, we tested interactions of eDNA  
153 states by spiking them independently or all states together.

154

155

## 156 2. Methods

### 157 2.1 Creation of eDNA states

158 **Adsorbed DNA State:** Sheared salmon sperm DNA (Invitrogen, Waltham, MA) was diluted  
159 to 100 ng/ $\mu$ L in 6 mL nuclease-free molecular grade water (Sigma-Aldrich, St. Louis, MO) in  
160 a 15 mL tube with 300 g (50 mg/mL) montmorillonite clay K10 (Fluka, Buchs, CH). One no-  
161 adsorbent control tube was created by diluting salmon DNA to 100 ng/ $\mu$ L in 1 mL nuclease-  
162 free molecular grade water, but with no clay. The tubes were shaken at 600 rpm for 48 hours.  
163 At 48 hours, the tube with the salmon DNA and clay was centrifuged at 4500 xg for five  
164 minutes and the supernatant was separated from the pelleted clay with a pipette. The pelleted  
165 clay was then washed using 6 mL nuclease-free molecular grade water by vortexing followed  
166 by centrifugation at 4500 xg for five minutes and the supernatant was separated to remove any  
167 non-adsorbed salmon DNA. This wash process was repeated one more time to remove any  
168 non-adsorbed salmon DNA. Finally, 4.5 mL of nuclease-free molecular grade water was  
169 added to suspend the clay pellet to create the adsorbed eDNA state spike. The control tube  
170 and all the supernatants from each washing step were stored in independent tubes at -20 °C.

171 **Dissolved DNA State:** DNA from ten (~0.25 g each) pieces of store-bought chicken breast  
172 was extracted using the DNeasy Blood and Tissue Kit (Qiagen, Hilden, Germany) according  
173 to the manufacturer's protocol. Each extraction was eluted in 200  $\mu$ L Buffer AE. The ten  
174 extractions were then combined and vortexed to create the dissolved DNA spike.

175 **Membrane-bound DNA state:** Mouse skin cells from cell line B16-F10 derived from mouse  
176 C57BL/6J (Jackson Laboratories, ME, USA) were resuspended in Dulbecco's Modified  
177 Eagle's Medium (ThermoFisher Scientific, Waltham, MA) containing 10 % Fetal Bovine  
178 Serum (ThermoFisher Scientific, MA) and 1 % Penicillin-Streptomycin (10,000 U/mL)  
179 (ThermoFisher Scientific, MA) in a 15 mL tube. Cells were spun at 125 x g for 5 minutes and  
180 the cell pellet was resuspended in 10 mL growth media and seeded into a tissue culture dish  
181 (TPP, Horsforth, UK). Cells were incubated for 10 days at 37 °C, 5 % CO<sub>2</sub>, and 95 %  
182 humidity to let them attach and recover to a concentration of  $1 \times 10^6$  cells/mL to 20 million cells  
183 counted using an automated Cell Counter System (Countess TC20, Biorad, Hercules, CA)  
184 which assessed cell viability via trypan blue exclusion. These cells were spun down at 125 x g  
185 for 5 minutes in a 50 mL tube and resuspended in 20 mL ( $1 \times 10^6$  cells/mL) of fresh growth  
186 media and used as a spike within 6 hours. The tube was centrifuged at 125 x g for five  
187 minutes to pellet the cells. Before spiking the cells, the supernatant was removed using a  
188 pipette and discarded. The pellet was then washed to remove any dissolved DNA by  
189 resuspending the pellet in 30 mL of Phosphate Buffer Saline (PBS) solution (0.137 M sodium  
190 chloride, 0.0027 M potassium chloride, 0.01 M sodium phosphate dibasic, 0.0018 M  
191 potassium phosphate monobasic, pH = 7.4). This was followed by centrifuging at 125 x g for  
192 five minutes, and the PBS supernatant was discarded as before. The cells were then  
193 resuspended in 50 mL of PBS to create the membrane-bound DNA spike.

### 194 2.2 Experimental procedure for state spiking

195 A total of three water matrices were used in the experiment: Milli-Q tap water (from  
196 Independent Q-POD® ultrapure water dispensing unit (Merck, Darmstadt, Germany), water  
197 from Lake Zurich, and water from Sihl River. Ten liters of water near Lake Zurich outlet  
198 (47°21'59.2"N 8°32'39.7"E ) and Sihl river (47°22'35.8"N 8°32'07.4"E) were collected on  
199 October 7, 2021, in the morning of the experiment and transported to the lab within 1 hour. At



200 the lab the pH, turbidity (absorbance), and temperature (°C) of the water matrices were tested  
201 using a HI-98194 multiparameter probe (Hanna Instruments, Woonsocket, RI) (Table 1).  
202 Three replicates for each water type were created for five treatments (Figure 2). The  
203 treatments consisted of spiked DNA from one of each state (i.e., membrane-bound DNA,  
204 adsorbed DNA, and dissolved DNA), one where all three states combined were combined,  
205 and a control with no spiked DNA (Figure 2). For each treatment, the desired state/s were  
206 spiked into 50 mL of water matrix. The volume of spiked states was 500 µL for membrane-  
207 bound DNA, 100 µL for adsorbed DNA-bound clay solution, and 50 for of dissolved DNA  
208 (Figure 2). The volumes were chosen for ease of spiking and to reduce the chance of  
209 accidental double-spiking. The water was then filtered through a 0.22 µm Isopore  
210 polycarbonate filter (GTTP02500, Millipore, Burlington, MA) in 25 mm Swinnex filter  
211 holders (Millipore, Burlington, MA) using a 50 mL syringe (Figure 1). 15 mL of the filtrate  
212 was transferred to a 50 mL falcon tube for dissolved DNA extraction. After filtration, air was  
213 passed through to remove any residual water and the filter was immediately removed from the  
214 housing and placed in a 1.5 mL tube with 600 µL of phosphate buffer (0.12 M Na<sub>2</sub>HPO<sub>4</sub>, 0.12  
215 M NaH<sub>2</sub>PO<sub>4</sub>, pH = 9) and shaken at 400 rpm for 20 min (Figure 1). The tube was then  
216 centrifuged at 13,000 rpm for 2 min. The supernatant was aspirated with a pipette and stored  
217 in a separate 1.5 mL tube. The tube with the supernatant was used to extract the adsorbed  
218 DNA, while the tube with the filter and pellet was used to extract the membrane-bound DNA.  
219 All three fractions (filtrate, supernate, and filter with pellet) were immediately frozen at -20  
220 °C until DNA extraction.

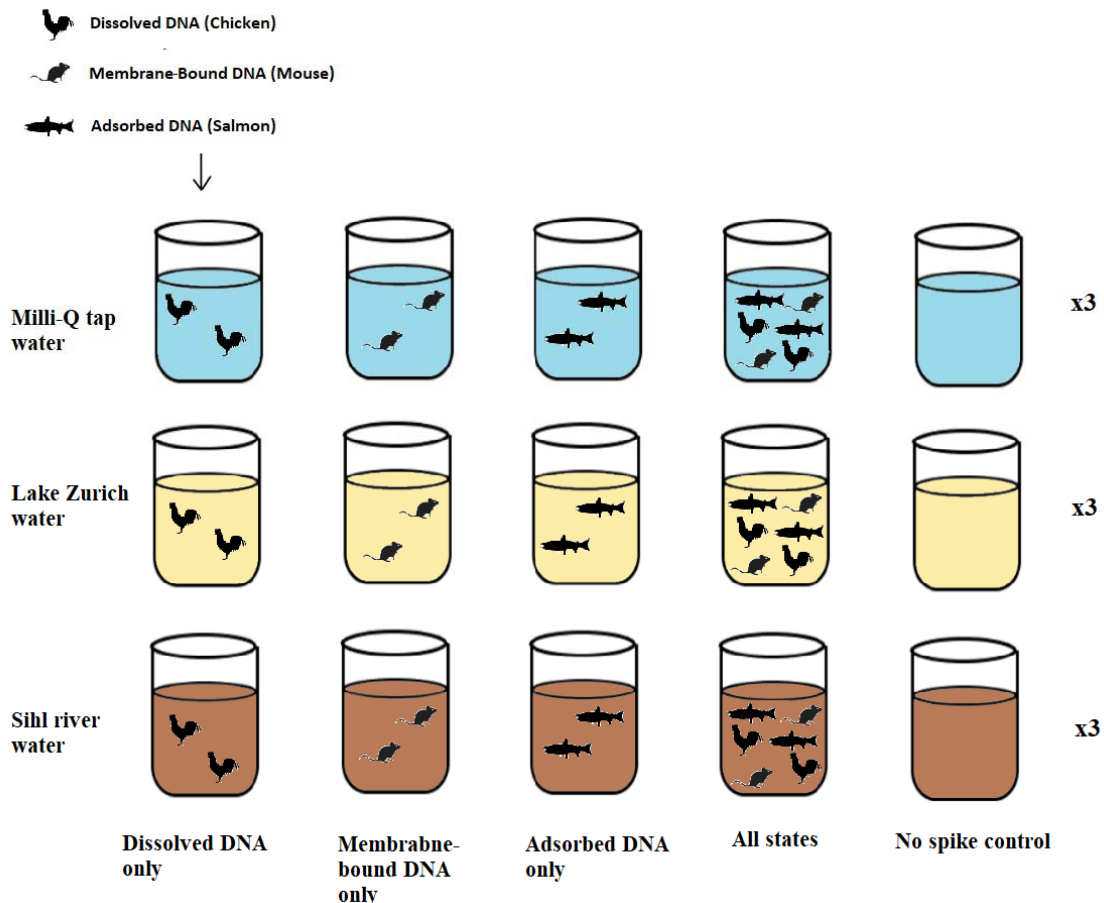

222 Figure 2: The experimental design used to test the influence of the water matrix and  
223 individual vs multiple spiked states on the isolation of eDNA states. All treatments were  
224 performed with three replicates each for a total of 45 experimental samples including none-  
225 spiked controls.

226

227 Table 1: Characteristics of different source water matrices used in this study

| Water matrix | Temperature (C°) | pH   | Turbidity (absorbance) | Total dissolved solids (ppm) |
|--------------|------------------|------|------------------------|------------------------------|
| Milli Q tap  | 20.7             | 7.21 | 0.047                  | 14                           |
| Lake Zurich  | 15.5             | 7.75 | 0.064                  | 146                          |
| Sihl River   | 12.7             | 7.89 | 0.138                  | 178                          |

228

### 229 2.3 DNA extraction methodologies for state separation

230 The three fractions of the DNA were extracted using three methods chosen specifically to  
231 isolate the desired state of eDNA (Figure 1). The dissolved DNA in the filtrate was  
232 concentrated using ethanol precipitation, the membrane-bound DNA on the filter and in the  
233 pellet was extracted following the lysis step using phenol-chloroform-isoamyl purification  
234 and concentrated using ethanol precipitation, and the adsorbed DNA in the phosphate buffer  
235 was extracted using a magnetic bead extraction protocol. One negative control was included  
236 in every batch of extractions for each method (N = 9).

237

#### 238 Ethanol precipitation

239 15 mL of filtrate was used for the isolation of dissolved DNA using ethanol precipitation.  
240 Samples were thawed and 1.2 mL of 5M sodium chloride and 33 mL of absolute ethanol  
241 (200-proof) were added to the tube. The tube was vortexed and incubated overnight at -20 °C.  
242 The tubes were then centrifuged at 10,000 xg at 4 °C for one hour. The supernatant was  
243 discarded. 5 mL of 75 % ethanol was added, inverted by hand ten times, and centrifuged at  
244 10,000 xg for 30 mins. The supernatant was discarded, and the pellet was air-dried for 30  
245 minutes. The pellet was then dissolved in 100 µL TE buffer which was then passed through  
246 the ZYMO Onestep PCR inhibitor removal kit and stored in 1.5 mL tubes at -20 °C until  
247 molecular analysis. This inhibitor removal step was used only for dissolved DNA samples  
248 extracted with the ethanol precipitation method.

249

#### 250 Phenol-chloroform-isoamyl extraction

251 The membrane-bound DNA from the filters was extracted using a phenol-chloroform-isoamyl  
252 (PCI) protocol (Deiner et al., 2015). We added 700 µL of Longmire Lysis Solution (100 mM  
253 Tris pH 8.0, 0.5 mM EDTA, 0.2% SDS, 200 mM NaCl) and 12 µL Proteinase K (40 mg/mL)  
254 to each of the 2 mL tubes containing the filters. The tubes were gently vortexed prior to  
255 overnight incubation at 56 °C to facilitate cell membrane lysis. After the incubation, the lysate

256 was transferred to a new sterile 2 mL tube with a pea-sized volume of grease (high vacuum,  
257 Dow Corning®). We then added 550 µL of PCI (25:24:1, Sigma, buffered pH8.0) to all tubes  
258 followed by shaking at 20 °C at 1,000 rpm. The tubes were then centrifuged at 10,000 xg for  
259 five minutes. The supernatant was transferred to another new sterile 2 mL tube with a pea-  
260 sized volume of grease to which we added 550 µL of CI (24:1, Sigma). This tube was also  
261 shaken for 5 min at 1000 rpm followed by centrifugation at 10,000x for 5 min. The  
262 supernatant was transferred to new 2 mL tubes (without grease) containing 44 µL of 5M NaCl  
263 and 1,100 µL of 200-proof ethanol and incubated at -20 °C overnight. The incubated tubes  
264 were centrifuged for 30 min at 10,000 x at 4 °C. The supernatant was carefully pipetted out  
265 and the pellet was washed twice with 75 % ethanol. The pellet was then allowed to air dry and  
266 eluted in 100 µL of TE buffer until molecular analysis.

267

### 268 **Magnetic bead extraction**

269 A magnetic bead extraction was used to extract and purify formerly adsorbed DNA in  
270 phosphate buffer using a version of Powersoil® DNA isolation protocol (Qiagen, Hilden,  
271 Germany) using homemade reagents (Sepulveda et al., 2019). The 600 µL of supernatant  
272 phosphate buffer containing the desorbed DNA was pipetted into a new 2 mL tube, ensuring  
273 the filter or the pellet at the bottom of the tube was not disturbed in the process. We then  
274 added 100 µL of protein precipitation solution and inhibitor flocculation solution and  
275 vortexed for ten seconds. The tubes were then placed in the freezer at 20 °C for 20 minutes.  
276 The tubes were removed and vortexed for ten seconds before centrifugation at 10,000 xg for  
277 five minutes. The supernatant was transferred to a new tube with 100 µL of 20% Sera-Mag  
278 SpeedBead Carboxylate modified magnetic beads (GE Healthcare Life Sciences, Pittsburgh,  
279 PA) in hybridization buffer. The tube was gently mixed by inversion and another 100 µL of  
280 hybridization buffer was added. The tube was gently mixed by inversion (10 x) and incubated  
281 at room temperature for ten minutes. The tube was then placed on a magnetic rack on a shaker  
282 (400 rpm) and shaken until all the beads migrated to the magnet (~ 20 minutes). The  
283 supernatant was then pipetted out without disturbing the magnetic beads. Two wash steps  
284 were performed where 1 mL of 75 % ethanol was added to the tube. The tube was then  
285 removed from the magnetic rack and vortexed for ten seconds, placed back onto the magnetic  
286 rack, and shaken until all the beads migrated to the magnet (~ 5 min). The ethanol was then  
287 pipetted out without disturbing the magnetic beads. The ethanol wash process was repeated  
288 one more time. The tubes were removed from the magnetic rack and air-dried for 20 minutes.  
289 The beads were then suspended in 100 µL TE buffer and pipette mixed until in solution and  
290 incubated at room temperature for ten minutes. The tube was then placed back onto the  
291 magnetic rack for 5 minutes and the TE buffer eluate was pipetted out and passed through a 2  
292 mL EconoSpin® Mini Spin column (Epoch, Fremont, CA) by centrifuging at 10,000 xg for  
293 one min to remove any residual magnetic beads in the solution and stored at -20 °C until  
294 molecular analysis.

295

### 296 **2.4 Development of target-specific primers and TaqMan hybridization probes**

297 We designed a multiplex quantitative PCR (qPCR) with four parallel assays to be run on the  
298 Roche 480 light cycler (Roche, Basel, Switzerland). Compatible fluorescent dyes (FAM, VIC,  
299 TexasRed, and CY5) were selected as recommended by the PrimeTime Multiplex Dye



300 Selection tool (web tool available from IDT DNA). Reference sequences for primer design  
 301 were obtained from GenBank (Clark, Karsch-Mizrachi, Lipman, Ostell, & Sayers, 2016)  
 302 (Table S1). To detect and quantify mitochondrial eDNA from mice (*Mus musculus*) and  
 303 chicken (*Gallus gallus*) we designed TaqMan® qPCR assays targeting the mitochondrial  
 304 NADH dehydrogenase subunit 2 (ND2) gene, a well-established phylogenetic marker in  
 305 vertebrates. As a nuclear marker, the single copy gene TGFb1 coding for the transformation  
 306 growth factor 1 in mice was selected. Previously designed chum salmon (*Oncorhynchus keta*)  
 307 primers for the cytochrome oxidase I gene (COI) were used with a modified TaqMan® probe  
 308 that did not have the minor groove binder (Homel et al., 2021) (Table 2) to decrease the cost of  
 309 the probe. The TaqMan assays for detection and quantification of the nuclear Tgfb1 gene in  
 310 mice and mitochondrial ND2 genes of chicken and mice were designed using the Primer  
 311 Express Software version 3.0 (Applied Biosystems, Waltham, MA) using default parameters.

312

313 Table 2: qPCR assays with their corresponding target genes, represented eDNA state and  
 314 fluorophores (in bold).

| Target organism<br>(Target gene)   | Represented State     | Forward primer              | Reverse primer                   | Probe                                                                                 |
|------------------------------------|-----------------------|-----------------------------|----------------------------------|---------------------------------------------------------------------------------------|
| Chicken<br>(mitochondrial ND2)     | Dissolved DNA         | CGAGCGATTGAAGCC<br>ACTAT    | TGGATCAGGCGTTGG<br>TTATG         | <b>5Cy5</b> /ACCCAATCA/TA<br>O/ACTGCATCAGCCCT<br>A/3IAbRQSp                           |
| Mouse<br>(mitochondrial ND2)       | Membrane-bound<br>DNA | CTATCACCCCTGCCAT<br>CATCTAC | CTGAATTCCAGGCCTA<br>CTCATATT     | <b>5TexRd-</b><br><b>XN</b> /TGGTGCTGGATAT<br>TGTGA<br>TTACAGGACC/3IAbR<br>QSp/       |
| Mouse<br>(nuclear TGFb1)           | Membrane-bound<br>DNA | CCTGGACTAGGCTGG<br>CTTCA    | TGTAGTCAAGAAGCC<br>GAAATGG       | <b>VIC</b> /ACTTGCAGCGAT<br>CCT/MGB-NFQ                                               |
| Chum salmon<br>(mitochondrial COI) | Adsorbed DNA          | CCGCTTTTTGTCTGAG<br>CTGACT  | AATTTTCGATCTGTGAG<br>CAACATAGTAA | <b>56-</b><br><b>FAM</b> /CACTGCTGT/ZE<br>N/A<br>CTTCTACTATTATCAC<br>TCCCC G/3IABkFQ/ |

315

### 316 **Specificity testing**

317 All qPCR assays were tested for specificity in-silico and experimentally. The in-silico testing  
 318 was conducted with NCBI Primer-BLAST tool (Ye et al., 2012) and OligoAnalyzer tool  
 319 (IDT, Coralville, IA). In Primer-BLAST, the specificity parameters were set to ensure a  
 320 minimum of three mismatches and at least two mismatches within the last five base pairs of  
 321 the 3' end on each primer and probe between the target and non-target organisms used in this  
 322 study. OligoAnalyzer was used to test the likelihood of dimer formation between the  
 323 various primers and probes. Using the default “qPCR” parameters we checked that  $\Delta G > -9$   
 324 kcal/mole ensured a low likelihood of self- or hetero-dimers formation in between any  
 325 primer and probe combinations. To experimentally test the specificity of the multiplex qPCR  
 326 we amplified standard curve of a single target in the multiplex reaction setup described below.  
 327 This was repeated by using each of the four target amplicons independently as template in the

328 multiplex qPCR setup. The resulting data was analyzed for cross-amplification or cross-  
329 reporting of targets as only one target should be reported from the multiplex qPCR regardless  
330 of all assays being available. The efficiencies of the single-species standard curves were  
331 compared to the efficiency of the multiplexed standard curves to ensure reliable  
332 quantification. The multiplex qPCR negative controls used throughout the experiment ensured  
333 no false positives due to dimer formation.

334

### 335 **qPCR preparation and cycling conditions**

336 The qPCR reactions were performed in 10  $\mu$ L reactions in 384 well plates on a Roche Light  
337 Cycler 480. Each reaction included 5  $\mu$ L Taqman<sup>TM</sup> Multiplex Master Mix (Applied  
338 Biosystems<sup>TM</sup>), 0.03  $\mu$ L of each primer at 100 nM, 0.025  $\mu$ L of each Taqman probe at 100  
339 nM, 1  $\mu$ L DNA extract, and 3.92  $\mu$ L of molecular grade water to bring the volume up to 10  
340  $\mu$ L. For simplex qPCR, the same reaction mixture was used but only one set of primers and  
341 probes were added and the volume of molecular grade water was adjusted to keep the reaction  
342 volume to 10  $\mu$ L. After an initial incubation for ten minutes at 95 °C, we performed 40 cycles  
343 with a denaturation step for 15 seconds at 95 °C and an annealing/extension step for 30  
344 seconds at 60 °C. For the preparation of all qPCR plates, we used the mosquito® LV pipetting  
345 robot (SPT Labtech Ltd, England) for the efficient and accurate preparation of qPCR plates.

346

### 347 **qPCR quality control and data interpretation**

348 The Light Cycler was calibrated for multiple emission spectra for the multiplex qPCR using a  
349 color compensation protocol utilizing the four fluorophores used in this study. We  
350 incorporated six replicates of the six-point standard curve on each qPCR ranging from  $10^7$   
351 copies/reaction to 100 copies/reaction. These standards were made by combining four  
352 individual gBlock gene fragments (Integrated DNA Technologies) that represent the target  
353 sequences from the four qPCR assays used in this study (Table S2). The qPCR efficiency was  
354 calculated using  $[E = -1 + 10^{(-1/\text{slope})}]$  where E is the qPCR efficiency and the slope is calculated  
355 with pooled six-point standard curves from all plates for enumerating copy numbers of the  
356 target amplicons. This efficiency and intercept were then used in the quantification of our  
357 experimental replicates by converting Cp values to copy numbers. We also used this pooled  
358 standard curve to determine the Limit of Detection (LOD) and Limit of Quantification (LOQ)  
359 using previously described statistical criteria (Klymus et al., 2020). The LOD is described as  
360 the lower standard dilution concentration where 95 % of the replicates demonstrate  
361 amplification and the LOQ is described as the lowest standard concentration with a coefficient  
362 of variation (CV) value below 35 %. Each qPCR plate also included six qPCR negative  
363 control wells with molecular grade water instead of template DNA to identify any  
364 contamination in the reagents or during qPCR setup.

365

## 366 **2.5 eDNA state recovery**

### 367 **Quantification of total eDNA yield**

368 The total eDNA yield of all treatment samples (N = 45), each spike (N = 3), and extraction  
369 controls (N = 9) were measured in 384 well plates using reagents from Qubit dsDNA HS

370 Assay Kit (Qubit Digital, London, UK), and analyzed by Spark® Multimode Microplate  
371 Reader (Tecan, Männedorf, CH). We used a seven-point standard curve at concentrations of  
372 0, 0.1, 0.2 0.5, 1, 5, and 10 ng/μL by diluting the 10 ng/μL standard provided by the  
373 manufacturer. Each reaction well consisted of 48 μL of Qubit HS 1x reaction mixture and 2  
374 μL of DNA standard, sample, spike, or control. Accurate pipetting was facilitated by a  
375 mosquito® LV pipetting robot (SPT Labtech Ltd, England). All standards and samples were  
376 analyzed in triplicate.

377

### 378 **State-specific isolation efficiency and percent recovery**

379 To calculate the extraction recovery of the DNA added to each replicate of the experiment,  
380 first, the spiked DNA for each of the three states was quantified. The concentration of target  
381 DNA recovered from the experimental samples was then quantified and compared with the  
382 spike to calculate the percent recovery of each DNA state.

383 For quantification of the dissolved state spike, 1 μL of the dissolved DNA spike was directly  
384 analyzed in triplicate using simplex qPCR to enumerate the dissolved DNA target copies per  
385 uL. This value was multiplied by the spike volume (50 μL) to calculate the total copy number  
386 of the spiked DNA. Using Equation 1, percent recovery was calculated where  $C_s$  is the  
387 number of DNA copies spiked in the dissolved state (per 15 mL),  $C_i$  is the initial spike  
388 concentration,  $V_{tot}$  is the total volume of the filtrate (50 mL), and  $V_s$  is the volume of the  
389 filtrate analyzed (15 mL). This volume correction is necessary as only 15 mL of filtrate could  
390 be used in the isolation id dissolved DNA using the ethanol precipitation method.

$$391 \quad \% \text{ recovery} = \frac{C_s}{C_i} * 100 \times \frac{V_{tot}}{V_s} \quad \text{Equation 1}$$

392 For quantification of the membrane-bound DNA spike, 2 mL of mouse cell spike solution was  
393 frozen at -20 °C. Three replicates of the spike were created by extracting 50 μL of the saved  
394 spike using the same phenol-chloroform-isoamyl protocol described above and analyzed with  
395 qPCR to enumerate the membrane-bound DNA target copies spiked into the experiments.

396 To calculate the percent recovery of the membrane-bound DNA from experimental samples  
397 we used equation 2, where  $C_s$  is the concentration of mouse DNA (mitochondrial or nuclear)  
398 detected in experimental samples (per 50 mL) and  $C_i$  is the initial spike concentration of  
399 mouse DNA.

$$400 \quad \% \text{ recovery} = \frac{C_s}{C_i} * 100 \quad \text{Equation 2}$$

401

402 The concentration of adsorbed DNA spike was calculated using equation 3, where  $C_{sp}$  is the  
403 concentration of spiked adsorbed DNA (copies DNA/mg clay),  $C_i$  (copies/μL) is the initial  
404 concentration of salmon DNA solution,  $V_i$  (μL) is the initial volume of salmon DNA solution,  
405  $C_{sup}$  (copies/μL) is the concentration of salmon DNA in the supernatant after 48 h of  
406 adsorption,  $C_{w1}$  (copies/μL) and  $C_{w2}$  (copies/μL) are concentrations of salmon DNA in the  
407 supernatant of the first and second wash step,  $V_w$  (μL) is the volume of water used in the wash  
408 steps and  $M_c$  (mg) is the mass of montmorillonite clay added to the adsorption reaction.

409 Finally, the adsorbed DNA was suspended in 3 mL of nuclease-free molecular grade water to

410 achieve a final adsorbed DNA spike concentration of 100 mg/mL. Concentrations of target  
411 DNA copies in  $C_i$ ,  $C_{sup}$ ,  $C_{w1}$ , and  $C_{w2}$  were quantified in triplicate using simplex qPCR.

412

$$413 \quad C_{sp} = \frac{\{(C_i * V_i) - (C_{sup} * V_i + (C_{w1} + C_{w2}) * V_w)\}}{M_c} \quad \text{Equation 3}$$

414

415 To calculate the extraction recovery of the adsorbed DNA in each sample, equation 4 was  
416 used where  $C_s$  is the concentration of salmon DNA detected from experimental samples (per  
417 50 mL) and  $C_{sp}$  is the theoretical adsorbed DNA spike concentration calculated in equation 3.

$$418 \quad \% \text{ recovery} = \frac{C_s}{C_{sp}} * 100 \quad \text{Equation 4}$$

419

## 420 **2.6 Statistical analyses**

421 We conducted an analysis of variance (One-way ANOVA) using the extraction methods,  
422 water matrix type, and the state of spiked DNA as dependent variables, and percent recovery  
423 as the independent variable. We used a one-way ANOVA to test whether a state isolation  
424 protocol was able to enrich the target state. This test was repeated for each of the three state  
425 isolation protocols used. A one-way ANOVA test was also used to test if any state isolation  
426 protocol was able to outperform others with respect to percent recovery of the target state.  
427 Finally, another one-way ANOVA was also used to determine whether a given water matrix  
428 had a significant impact in determining the success of eDNA state isolation based on the  
429 increased recovery of a target state. We used a student's t-test to evaluate the effect of spiking  
430 a given state individually in a sample or multiple states spiked together. The t-test was also  
431 used for testing the variation in the recovery of mitochondrial and nuclear DNA recovery  
432 from spiked mouse cells. We conducted the Shapiro-Wilk test of normality, and Levene's test  
433 to check the homogeneity of variances to ensure our data met the assumptions of parametric t-  
434 tests and ANOVA. All ANOVA tests that rejected the null ( $\alpha = 0.01$ ) were followed up with  
435 Tukey's post hoc test to identify what dependent variables caused a significant difference. All  
436 data analysis was conducted in R version 4.1.3 using the package tidyverse package  
437 (Wickham et al., 2019).

438

## 439 **3. Results**

### 440 **3.1 Performance of multiplex qPCR assays**

441 None of the qPCR assays used in this study cross-amplified other targets in multiplex  
442 reactions. This was confirmed by the lack of non-specific amplification or fluorescence when  
443 single target standard curves were added to the multiplex reaction mix. All four multiplex  
444 qPCR assays used in the study had a Limit of Detection (LOD) at 10 copies/reaction and the  
445 Limit of Quantification (LOQ) was 100 copies/reaction for all targets. The efficiencies of  
446 pooled multiplex standard curves from all plates used in the experiment were 0.85, 0.89, 0.85,  
447 and 0.93 for salmon (adsorbed DNA), chicken (dissolved DNA), and mouse mitochondrial  
448 target (membrane-bound DNA), and mouse nuclear (membrane-bound DNA) assays

449 respectively (Figure S1). This efficiency was comparable with simplex standard curves  
450 allowing accurate quantification of the target DNA (Figure S2).

451 None of the negative controls, including no spike controls, extractions negatives, and qPCR  
452 negative controls showed amplification over the LOD in all three qPCR replicates for any of  
453 the four targets. However, below LOD concentrations (i.e. < 10 copies/reaction) of target  
454 DNA were detected in some no-spike controls. This was observed in one, nine, four and  
455 thirteen qPCR replicates for mouse nuclear, mouse mitochondrial, salmon, and chicken  
456 targets respectively of a total of 81 no-spike controls qPCR replicates. This was only observed  
457 in the no-spike controls processed using methods targeting membrane-bound and adsorbed  
458 eDNA. Since the qPCR and extraction negative controls showed no amplification, the cause  
459 of this contamination can be incomplete sterilization of beakers between experiments, and/or  
460 the natural presence of target DNA from environmental waters from Lake Zurich and the Sihl  
461 river. The low concentrations and the nature of this contamination are unlikely to have  
462 affected the results of this experiment.

463

### 464 **3.2 State-specific DNA isolation**

465 Species-specific isolation of DNA was evaluated based on the presence of non-target states of  
466 eDNA in a given extraction protocol. Thus, this analysis can be conducted only on treatments  
467 where all eDNA states were spiked altogether. None of the protocols tested were able to  
468 completely isolate the target eDNA state. Specifically, all states were detected in replicates  
469 where they were not expected (Table 3, Figure 3). However, some protocols resulted in  
470 limiting non-target extraction and enriching the target eDNA state. For instance, the protocol  
471 designed to isolate membrane-bound eDNA (filtration and desorption followed by PCI  
472 extraction on the pellet) resulted in increased enrichment of membrane-bound DNA state  
473 (One-way ANOVA,  $F(3, 102) = [152.8]$ ,  $p = 2e-16$ ) as the percent recovery of membrane-  
474 bound DNA was significantly higher than that of dissolved (Tukey HSD,  $p = 0.00$ , 95% C.I. =  
475  $[31.46, 43.84]$ ) and adsorbed DNA (Tukey HSD,  $p = 0.00$ , 95% C.I. =  $[31.19, 43.58]$ ) (Figure  
476 3C, D [PCI extraction]). This result was not significantly different between mitochondrial and  
477 nuclear targets of membrane-bound DNA (Tukey HSD,  $p = 0.65$ , 95% C.I. =  $[-9.14, 3.45]$ )  
478 (Figure 3C, D, Table 3 [PCI extraction]). In the protocol designed to isolate dissolved DNA,  
479 the DNA from both membrane-bound and adsorbed states were detected with similar percent  
480 recoveries as dissolved DNA (Table 3, Figure 3 B,C [Ethanol precipitation]). Filtration  
481 followed by ethanol precipitation on the filtrate, therefore, did not lead to effective isolation  
482 of dissolved DNA from the other two as the percent recovery of dissolved DNA was not  
483 significantly higher than that of the adsorbed (One-way ANOVA,  $F(2, 69) = [5.71]$ ,  $p =$   
484  $0.005$ ; Tukey HSD,  $p = 0.12$ , 95% C.I. =  $[-0.02, 0.28]$ ) or membrane-bound DNA Tukey  
485 HSD,  $p = 0.29$ , 95% C.I. =  $[-0.27, 0.60]$ ). Similarly, the protocol designed for adsorbed state  
486 isolation (filtration followed by desorption and magnetic bead extraction on the supernatant)  
487 did not isolate adsorbed DNA as the percent recovery of adsorbed DNA was significantly  
488 lower than that of membrane-bound DNA (One-way ANOVA,  $F(3, 97) = [40.82]$ ,  $p = 2.0^{-16}$ ;  
489 Tukey HSD,  $p = 0.0$ , 95% C.I. =  $(4.20, 9.53)$ ). Additionally, the resulting percent recovery of  
490 adsorbed DNA was not significantly higher than that of dissolved DNA when processed using  
491 the protocol for adsorbed DNA isolation (Tukey HSD,  $p = 0.56$ , 95% C.I. =  $[-1.30, 3.98]$ )  
492 (Table 4, Figure 3A, B [magnetic bead extraction]).

493



494 Table 3: Percent recovery of target and non-target eDNA expressed based on DNA state  
 495 (columns) and extraction protocol (rows) used to isolate that expected state. Cells in BOLD  
 496 indicate replicates with high expected recovery of the target eDNA state.

|                          | Dissolved State (%) | Mitochondrial membrane-bound state (%) | Nuclear membrane-bound state (%) | Adsorbed state (%) |
|--------------------------|---------------------|----------------------------------------|----------------------------------|--------------------|
| Dissolved state protocol | <b>0.72 ± 0.68</b>  | 0.147 ± 0.084                          | BLOQ                             | 0.531 ± 0.40       |
| Membrane-bound protocol  | 0.797 ± 1.20        | <b>45.04 ± 15.02</b>                   | <b>48.91 ± 26.34</b>             | 1.32 ± 0.595       |
| Adsorbed state protocol  | 0.82 ± 1.44         | 10.7 ± 4.78 <sup>#</sup>               | 8.58 ± 7.59 <sup>#</sup>         | <b>3.46 ± 3.00</b> |
| Total recovered          | 2.21 ± 2.36         | 54.11 ± 19.24                          | 45.05 ± 28.74                    | 5.08 ± 2.28        |

497 # Some replicates of this group were Below Limit Of Quantification (BLOQ)

498

### 499 3.3 State-specific DNA recovery

500 The state-specific DNA recovery is used to evaluate how much of the target eDNA state was  
 501 recovered from an experimental unit (i.e. eDNA extraction protocols) irrespective of the  
 502 presence of non-target eDNA states. The state-specific spike concentrations, in theory, reflect  
 503 100 % recovery of a given state (Table 4). The recovery of membrane-bound DNA using the  
 504 filtration followed by desorption and performing PCI extraction on the pellet was significantly  
 505 greater than the recovery of membrane-bound state in other methods. This was the case for  
 506 both mitochondrial (One-way ANOVA,  $F(2, 149) = [178.4]$   $p = 2e-16$ ) and the nuclear  
 507 targets of membrane-bound DNA (One-way ANOVA,  $F(2, 96) = [46.7]$   $p = 7.7e-10$ ) when  
 508 compared to other isolation protocols (Table 4). There was no significant difference in the  
 509 percent recovery of mitochondrial and nuclear targets using the membrane-bound isolation  
 510 protocol (t-test,  $df = 78.70$ ,  $t = -0.06$ ,  $p = 0.94$ ), however, the concentration of mitochondrial  
 511 marker was more than two orders of magnitude higher in both, the spike and the recovered  
 512 DNA (Table 4, S3). The recovery of adsorbed DNA was significantly higher using the  
 513 protocol specially designed for it (i.e. filtration, followed by desorption and magnetic bead  
 514 extraction on the supernatant) when compared to the other two methods (One-way ANOVA,  
 515  $F(2, 156) = [43.8]$   $p = 8.2e-16$ ). Tukey's post hoc test revealed significant increases in  
 516 adsorbed DNA recovery between the magnetic bead method, and both PCI (Tukey HSD,  $p <$   
 517  $0.01$ , 95% C.I. = [- 3.69, -2.15]) and EtOH precipitation methods (Tukey HSD,  $p <$   
 518  $0.01$ , 95% C.I. = [-3.03, -1.46]). The DNA recovery of dissolved DNA was not significantly greater  
 519 using the protocol designed for isolating dissolved DNA as compared to other protocols (One-  
 520 way ANOVA,  $F(2, 150) = [0.12]$   $p = 0.90$ ).

521 The eDNA yield of the full-process negative controls from the lake and river sample i.e.,  
 522 without any spikes can indicate the magnitude of genetic information available in a given  
 523 state and further elucidate on total eDNA recovery from each method. The eDNA yields of  
 524 no-spike controls using the adsorbed state and membrane-bound state protocols were  $0.34 \pm$   
 525  $0.22$  ng/ $\mu$ L and  $0.74 \pm 0.06$  ng/ $\mu$ L respectively for Lake Zurich water, and  $0.24 \pm 0.25$  ng/ $\mu$ L  
 526 and  $1.07 \pm 0.36$  ng/ $\mu$ L respectively for Sihl river water. The yield of the dissolved eDNA

527 fraction represented by the ethanol precipitation method was below the limit of detection for  
528 all water matrices.

529

530 Table 4: Spike, recovery, and loss of DNA based on the state the DNA was spiked in.

|                                        | Dissolved State                       | Membrane-bound state (mitochondrial)  | Membrane-bound state (nuclear)        | Adsorbed state                        |
|----------------------------------------|---------------------------------------|---------------------------------------|---------------------------------------|---------------------------------------|
| DNA spike concentration (copies/50 ml) | $4.0 \times 10^8$                     | $8.5 \times 10^6$                     | $3.0 \times 10^4$                     | $2.5 \times 10^7$                     |
| Total recovery (copies/50 ml)          | $8.7 \times 10^6 \pm 9.3 \times 10^6$ | $4.6 \times 10^6 \pm 1.6 \times 10^6$ | $1.4 \times 10^4 \pm 8.6 \times 10^3$ | $1.3 \times 10^6 \pm 5.7 \times 10^5$ |
| Percent recovery (%)                   | $2.21 \pm 2.36$                       | $54.11 \pm 19.24$                     | $45.05 \pm 28.74$                     | $5.08 \pm 2.28$                       |
| Percent DNA lost (%)                   | $97.78 \pm 2.35$                      | $45.88 \pm 19.04$                     | $54.95 \pm 28.74$                     | $94.92 \pm 2.32$                      |

531

532

### 533 3.4 Effect of water matrix and spiking multiple states altogether

534 Overall, the percent recovery of DNA was not significantly influenced by whether a given  
535 state-controlled spike was spiked individually with other eDNA states (t-test,  $df = 591.82$ ,  $t =$   
536  $0.32$ ,  $p = 0.75$ ). Similarly, the overall percent recovery was not significantly affected by the  
537 water matrix (MilliQ tap, Lake Zurich, or Sihl river) they were spiked in (One-way ANOVA,  
538  $F(2, 276) = [0.05]$ ,  $p = 0.94$ ). However, in select scenarios, water matrix type did have a  
539 significant impact on the recovery of adsorbed and dissolved states of DNA. The recovery of  
540 adsorbed DNA, using the magnetic bead extraction protocol, was significantly higher in the  
541 Milli-Q water matrix when compared to the recovery in Lake Zurich (One-way ANOVA,  $F(2,$   
542  $51) = [112.2]$ ,  $p < 2e-16$ ; Tukey HSD,  $p < 0.01$ , 95% C.I. =  $[4.30, 6.20]$ ) and Sihl river water  
543 (Tukey HSD,  $p < 0.01$ , 95% C.I. =  $[4.45, 6.36]$ ), while the recovery of adsorbed DNA was not  
544 significantly different in the two environmental waters (Tukey HSD,  $p < 0.01$ , 95% C.I. =  $[-$   
545  $1.02, 0.79]$ ) (Figure 3B [magnetic bead extraction]). Similarly, the recovery of dissolved  
546 DNA, using the ethanol precipitation protocol, was significantly higher in the Milli-Q water  
547 matrix when compared to the recovery in Lake Zurich (One-way ANOVA,  $F(2, 51) = [8.06]$ ,  
548  $p = 9.1e-4$ ; Tukey HSD,  $p < 0.01$ , 95% C.I. =  $[4.30, 6.20]$ ) and Sihl river water (Tukey HSD,  
549  $p < 0.01$ , 95% C.I. =  $[4.45, 6.36]$ ), while the recovery of dissolved DNA in the two  
550 environmental waters was not significantly different Tukey HSD,  $p < 92$ , 95% C.I. =  $[-1.12,$   
551  $0.80]$ ) (Figure 3A [magnetic bead extraction]). Contrary to this pattern, the recovery of  
552 membrane-bound DNA, using the PCI extraction protocol, was significantly higher in Lake  
553 One-way ANOVA,  $F(2, 51) = [9.75]$ ,  $p = 2.6e-6$ ; Tukey HSD,  $p < 0.01$ , 95% C.I. =  $[-39.84, -$   
554  $11.17]$ ) Zurich and Sihl river (Tukey HSD,  $p < 0.01$ , 95% C.I. =  $[-32.43, -3.76]$ ) waters  
555 compared to Milli-Q water, although the membrane-bound DNA recovery was not  
556 significantly different between the two environmental water matrices (Tukey HSD,  $p = 0.43$ ,  
557 95% C.I. =  $[-21.74, 6.93]$ ) (Figure 3C, D [PCI extraction]).

558 In select scenarios, we also observed an increase in the percent recovery of dissolved DNA in  
559 non-target protocols, i.e. protocols designed for adsorbed and membrane-bound DNA  
560 isolation. The percent recovery of dissolved DNA using the ethanol precipitation protocol  
561 ( $0.216 \pm 0.108$  %) increased dramatically using the adsorbed DNA protocol ( $3.76 \pm 0.179$  %)  
562 and membrane-bound DNA protocol ( $3.93 \pm 2.27$  %) in Milli-Q tap water when all three  
563 states were spiked together (Figure 3A, S3A). This represents an increase in recovery of  
564 ~1640% and ~1256 % respectively of dissolved DNA in using protocols targeting the  
565 adsorbed and membrane-bound DNA respectively (Figure 3A, S3A). Interestingly, this was  
566 the case only when other states, i.e., cells and clay, were present and only in the Milli-Q tap  
567 water matrix (Figure 3A, S3A). The treatment with only dissolved DNA spiked in Milli-Q tap  
568 water did not show this dramatic increase (Figure 3A, S3A).

569

570

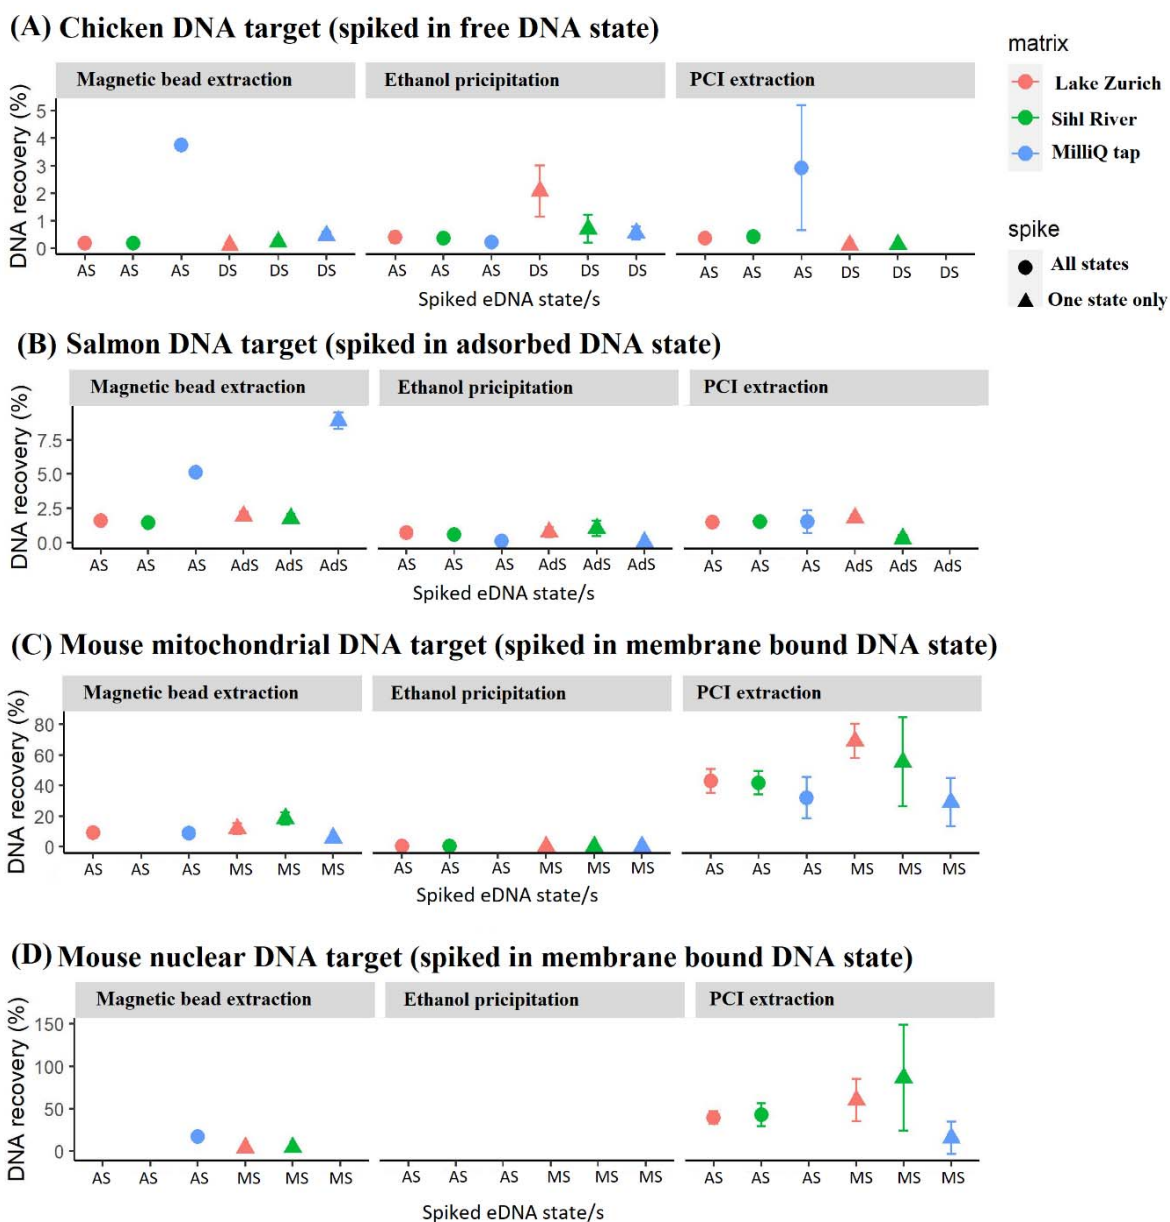

571

572 Figure 3: Percent recovery of spiked eDNA states observed in three different extraction  
 573 methods. Colors represent the water matrix type while the shape of the data points indicates  
 574 whether all states were spiked together, or the target state spiked by itself. The x-axis shows  
 575 the spiked eDNA state (AS = All States, DS = Dissolved State, AdS = Adsorbed State, and  
 576 MS = Membrane-bound State). Error bars indicate the standard deviation between three  
 577 biological replicates.

578

579

580

#### 581 **4. Discussion**

582 Answering questions regarding the ecology of eDNA such as persistence and transport require  
583 effective and consistently replicable methods to capture and isolate particular states of eDNA.  
584 Here we demonstrate the utility of controlled experiments using state-specific spikes from  
585 different species to evaluate DNA extraction protocols, their effect on the isolation and  
586 recovery of each of the DNA states to aid in the understanding of the ecology of eDNA in  
587 different water chemistries. We show that while no methods were able to isolate a state in its  
588 entirety, we could enrich the recovery of each state to some extent. Because of the novel  
589 experimental design we also measured and identified the fate of each DNA state when it was  
590 not captured using the targeted protocol. The protocols for state sorting were able to enrich  
591 the target state, especially in the case of membrane-bound and adsorbed DNA states.  
592 However, there was a significant cross-over between states indicating inefficiencies in sample  
593 processing methods and potential dynamics of eDNA states after the collection of the water  
594 sample. Additionally, a large proportion of DNA in all states was lost and not recovered by  
595 any of the treatments. Further, experimentation using a multiple-state-specific spike model  
596 designed here can shed light on the state dynamics of eDNA during the isolation process and  
597 help to optimize state isolation protocols.

598

#### 599 **Isolation of target states**

600 The results of this study highlight current limitations with state-specific DNA isolation  
601 protocols and help identify steps in their optimization. Previous studies have utilized methods  
602 for sorting and isolating eDNA states but have not been able to verify their success in doing  
603 so (Corinaldesi et al., 2005; Lever et al., 2015; Torti et al., 2015; Yuan et al., 2019).  
604 Unverified methods with unknown levels of inefficiencies can lead to misinterpretation of  
605 results. Here we show that none of the isolation methods used in these previous studies were  
606 able to completely isolate the target state of eDNA, but some were able to enrich a target  
607 state. For example, when all three states were spiked together, membrane-bound DNA  
608 accounted for a majority (~ 85.6%) of the DNA recovered using a protocol designed for  
609 membrane-bound DNA isolation, the adsorbed DNA accounted for two-thirds (~ 68.1 %) of  
610 total recovered DNA using the protocol designed for the isolation of adsorbed DNA, however,  
611 the dissolved DNA state only accounted for a third (~ 32.5%) of the total recovered DNA  
612 from the protocol designed to isolate the dissolved state of eDNA.

613

#### 614 **Effect of water matrix characteristics on eDNA state isolation**

615 This study performed all experiments in three water matrices, two environmental (Lake  
616 Zurich and Sihl river) and one artificial (Milli-Q tap). Overall, the change in environmental  
617 waters did not significantly impact the results of state isolation even though they had different  
618 abiotic conditions (Table 1). The least influence was noted in the case of isolation of  
619 membrane-bound DNA, probably because the isolation of membrane-bound DNA from other  
620 states is primarily a physical separation while other states of eDNA might experience more  
621 chemical interactions influenced by water matrix during their separation. For instance,



622 experiments in Milli-Q water matrix led to increased recovery of adsorbed and dissolved  
623 DNA in select scenarios compared to the two environmental water matrices.

624 The recovery of adsorbed DNA was significantly higher in Milli-Q tap water than in the two  
625 environmental waters using the adsorbed state protocol (Figure 3). The difference between the  
626 Milli-Q tap and environmental waters was the more circumneutral pH, and absence of other  
627 particles and organics in the Milli-Q water (Table 1). The phosphates in the desorption buffer  
628 may have competitively interacted with these other particles reducing the desorption  
629 efficiency and thus the percent recovery. Improving the recovery of the adsorbed state of  
630 eDNA requires an improved understanding of the mechanisms that create the adsorbed state  
631 of eDNA in the first place. Adsorption of DNA onto mineral surfaces is governed by  
632 interactions of multiple mechanisms including electrostatic forces, hydrogen bonding, ligand  
633 exchange, and cation bridging (Franchi et al., 1999; Pietramellara et al., 2001; Saeki et al.,  
634 2010; Yu et al., 2013). Furthermore, the water chemistry can impact the adsorption  
635 mechanisms even when the adsorbent and adsorbate are consistent (Kirtane et al., 2020). pH  
636 and ionic strength have been categorized as the driving characteristics of a solution to  
637 influence the adsorption mechanisms (Yu et al., 2013). Increased pH (>5) reduces the  
638 protonation of DNA bases giving it a net negative charge, thus reducing adsorption via  
639 electrostatic forces with predominantly negatively charged mineral clay surfaces, and  
640 increasing the effect of cation bridging (Xu et al., 2003; Yu et al., 2013). Increased  
641 concentrations of cations in the water matrix increase the adsorption of DNA onto mineral  
642 surfaces via cation bridging (Cai et al., 2006a; Levy-Booth et al., 2007).

643 Dissolved DNA recovery increased by over an order of magnitude when extracted using  
644 protocols for membrane-bound and adsorbed DNA extraction but only in one scenario  
645 containing the Milli-Q water matrix with all states spiked together (Figure 3). The  
646 circumneutral pH of the Milli-Q water likely caused the spiked dissolved DNA to rapidly  
647 adsorb to the clay particles and cells in the water leading to an increased recovery of dissolved  
648 DNA in method treatments targeted toward the extraction of membrane-bound and adsorbed  
649 states (Mauvisseau et al., 2022). This effect required both Milli-Q water and the presence of  
650 adsorbents in the water as this increase was not observed in the treatments with environmental  
651 water matrices or in Milli-Q water with only dissolved DNA spiked into it. Thus, we  
652 recommend the use of synthetic water matrices instead of Milli-Q water in future studies for  
653 reproducible controlled experiments that better reflect the water chemistries in the  
654 environment.

655

## 656 **Strategies for improving eDNA state isolation and recovery**

657 Due to the novel ability to quantify state-specific extraction efficiencies and the level of  
658 isolation of a target state, this experiment also aided to identify various opportunities to  
659 improve state sorting and extraction methods. The biggest room for improvement was in the  
660 case of extraction of dissolved and adsorbed DNA. This is also intuitive as most development  
661 of methods has been inadvertently targeted toward membrane-bound DNA (Pawlowski et al.,  
662 2021; Tsuji et al., 2019). The challenge with the extraction of dissolved DNA is that of  
663 concentration or aggregation. Unlike the other states, dissolved DNA cannot be easily  
664 concentrated via filtration. We utilized ethanol precipitation, the most popular method for  
665 dissolved DNA concentration, but alternative methods for aggregation such as column  
666 chromatography, magnetic bead extraction, and lyophilization can be tested to improve the

667 recovery of dissolved DNA (Calderón-Franco et al., 2021; Rees et al., 2014; Yuan et al.,  
668 2019).

669

670 The recovery of adsorbed DNA will be improved by understanding the mechanistic  
671 interactions between the particles and DNA. In this case, we used a model mineral clay,  
672 montmorillonite, which binds to the sugar-phosphate backbone of DNA via electrostatic  
673 attraction or cation-bridging (Saeki et al., 2010; Sheng et al., 2019). Thus, the addition of  
674 phosphates to the mix is likely to weaken and replace those bonds, thus desorbing the DNA  
675 into solution. In this experiment, we used two phosphates ( $\text{Na}_2\text{HPO}_4$  and  $\text{NaH}_2\text{PO}_4$ ) at 0.12M  
676 each (Yuan et al., 2019). Other studies have hypothesized hexaphosphates or deoxyribose  
677 triphosphates to improve the desorption ability (Direito et al., 2012; Lever et al., 2015). Since  
678 the recovery of adsorbed DNA was reduced in environmental matrices as compared with  
679 Milli-Q water when treated with the adsorbed state protocol, we hypothesize that the  
680 reduction of recovery is attributed to incomplete desorption of adsorbed DNA due to  
681 competitive interactions with other particles and organics in the environmental water  
682 matrices. Future studies should evaluate the effect of increasing phosphate concentrations and  
683 using varied forms of phosphates discussed on the desorption of DNA from complex  
684 environmental matrices. In natural waters, DNA is likely to be adsorbed to or otherwise  
685 interacting with numerous types of particles such as clays, porous carbons, organic molecules,  
686 metal oxides, and even biofilms, etc. (Kirtane et al., 2020; Saeki et al., 2010; Sheng et al.,  
687 2019; Sodnikar et al., 2021). As discussed above, the water chemistry impacts the adsorption  
688 mechanism and thus the success of desorption strategies. In this experiment, the adsorbed  
689 state spike was created by adding montmorillonite clay and salmon DNA in molecular grade  
690 water. Hence, future studies should consider using a mixture of complex adsorbents instead of  
691 a single model mineral clay and create the adsorbed DNA state spike in relevant  
692 environmental or synthetic waters to better replicate the “real-world” behavior of adsorbed  
693 DNA state and optimize the methods to isolate it.

694

695

696

697 **References**

- 698 Barnes, M. A., & Turner, C. R. (2016). The ecology of environmental DNA and implications  
699 for conservation genetics. *Conservation Genetics*, 17(1), 1–17.  
700 <https://doi.org/10.1007/s10592-015-0775-4>
- 701 Barrenechea Angeles, I., Romero-Martínez, M. L., Cavaliere, M., Varrella, S.,  
702 Francescangeli, F., Piredda, R., Mazzocchi, M. G., Montesor, M., Schirone, A.,  
703 Delbono, I., Margiotta, F., Corinaldesi, C., Chiavarini, S., Montereali, M. R., Rimauro,  
704 J., Parrella, L., Musco, L., Dell’Anno, A., Tangherlini, M., ... Frontalini, F. (2023).  
705 Encapsulated in sediments: EDNA deciphers the ecosystem history of one of the most  
706 polluted European marine sites. *Environment International*, 107738.  
707 <https://doi.org/10.1016/j.envint.2023.107738>
- 708 Cai, P., Huang, Q., & Zhang, X. (2006a). Microcalorimetric studies of the effects of MgCl<sub>2</sub>  
709 concentrations and pH on the adsorption of DNA on montmorillonite, kaolinite and  
710 goethite. *Applied Clay Science*, 32(1–2), 147–152.
- 711 Cai, P., Huang, Q.-Y., & Zhang, X.-W. (2006b). Interactions of DNA with clay minerals and  
712 soil colloidal particles and protection against degradation by DNase. *Environmental  
713 Science & Technology*, 40(9), 2971–2976.
- 714 Calderón-Franco, D., van Loosdrecht, M. C., Abeel, T., & Weissbrodt, D. G. (2021). Free-  
715 floating extracellular DNA: Systematic profiling of mobile genetic elements and  
716 antibiotic resistance from wastewater. *Water Research*, 189, 116592.
- 717 Capo, E., Giguët-Covex, C., Rouillard, A., Nota, K., Heintzman, P. D., Vuillemin, A.,  
718 Ariztegui, D., Arnaud, F., Belle, S., & Bertilsson, S. (2021). Lake sedimentary DNA  
719 research on past terrestrial and aquatic biodiversity: Overview and recommendations.  
720 *Quaternary*, 4(1), 6.
- 721 Corinaldesi, C., Danovaro, R., & Dell’Anno, A. (2005). Simultaneous recovery of  
722 extracellular and intracellular DNA suitable for molecular studies from marine  
723 sediments. *Applied and Environmental Microbiology*, 71(1), 46–50.
- 724 Deiner, K., Bik, H. M., Mächler, E., Seymour, M., Lacoursière-Roussel, A., Altermatt, F.,  
725 Creer, S., Bista, I., Lodge, D. M., de Vere, N., Pfrender, M. E., & Bernatchez, L.  
726 (2017). Environmental DNA metabarcoding: Transforming how we survey animal and  
727 plant communities. *Molecular Ecology*, 26(21), 5872–5895.  
728 <https://doi.org/10.1111/mec.14350>
- 729 Deiner, K., Walser, J.-C., Mächler, E., & Altermatt, F. (2015). Choice of capture and  
730 extraction methods affect detection of freshwater biodiversity from environmental  
731 DNA. *Biological Conservation*, 183, 53–63.  
732 <https://doi.org/10.1016/j.biocon.2014.11.018>
- 733 Demanèche, S., Jocteur-Monrozier, L., Quiquampoix, H., & Simonet, P. (2001). Evaluation of  
734 biological and physical protection against nuclease degradation of clay-bound plasmid  
735 DNA. *Applied and Environmental Microbiology*, 67(1), 293–299.
- 736 Direito, S. O., Marees, A., & Röling, W. F. (2012). Sensitive life detection strategies for low-  
737 biomass environments: Optimizing extraction of nucleic acids adsorbing to terrestrial  
738 and Mars analogue minerals. *FEMS Microbiology Ecology*, 81(1), 111–123.
- 739 Franchi, M., Bramanti, E., Morassi Bonzi, L., Luigi Orioli, P., Vettori, C., & Gallori, E.  
740 (1999). Clay-nucleic acid complexes: Characteristics and implications for the  
741 preservation of genetic material in primeval habitats. *Origins of Life and Evolution of  
742 the Biosphere*, 29(3), 297–315.
- 743 Harrison, J. B., Sunday, J. M., & Rogers, S. M. (2019). Predicting the fate of eDNA in the  
744 environment and implications for studying biodiversity. *Proceedings of the Royal  
745 Society B: Biological Sciences*, 286(1915), 20191409.  
746 <https://doi.org/10.1098/rspb.2019.1409>

- 747 Homel, K. M., Franklin, T. W., Carim, K. J., McKelvey, K. S., Dysthe, J. C., & Young, M. K.  
748 (2021). Detecting spawning of threatened chum salmon *Oncorhynchus keta* over a  
749 large spatial extent using eDNA sampling: Opportunities and considerations for  
750 monitoring recovery. *Environmental DNA*, 3(3), 631–642.
- 751 Jo, T., & Yamanaka, H. (2022). Meta-analyses of environmental DNA downstream transport  
752 and deposition in relation to hydrogeography in riverine environments. *Freshwater*  
753 *Biology*.
- 754 Kirtane, A., Atkinson, J. D., & Sassoubre, L. (2020). Design and validation of passive  
755 environmental DNA samplers using granular activated carbon and  
756 montmorillonite clay. *Environmental Science & Technology*, 54(19), 11961–11970.
- 757 Kirtane, A., Wilder, M. L., & Green, H. C. (2019). Development and validation of rapid  
758 environmental DNA (eDNA) detection methods for bog turtle (*Glyptemys*  
759 *muhlenbergii*). *PLoS One*, 14(11), e0222883.
- 760 Klymus, K. E., Merkes, C. M., Allison, M. J., Goldberg, C. S., Helbing, C. C., Hunter, M. E.,  
761 Jackson, C. A., Lance, R. F., Mangan, A. M., & Monroe, E. M. (2020). Reporting the  
762 limits of detection and quantification for environmental DNA assays. *Environmental*  
763 *DNA*, 2(3), 271–282.
- 764 Lamb, P. D., Fonseca, V. G., Maxwell, D. L., & Nnanatu, C. C. (2022). Systematic review  
765 and meta-analysis: Water type and temperature affect environmental DNA decay.  
766 *Molecular Ecology Resources*.
- 767 Lever, M. A., Torti, A., Eickenbusch, P., Michaud, A. B., Šantl-Temkiv, T., & Jørgensen, B.  
768 B. (2015). A modular method for the extraction of DNA and RNA, and the separation  
769 of DNA pools from diverse environmental sample types. *Frontiers in Microbiology*, 6,  
770 476.
- 771 Levy-Booth, D. J., Campbell, R. G., Gulden, R. H., Hart, M. M., Powell, J. R., Klironomos, J.  
772 N., Pauls, K. P., Swanton, C. J., Trevors, J. T., & Dunfield, K. E. (2007). Cycling of  
773 extracellular DNA in the soil environment. *Soil Biology and Biochemistry*, 39(12),  
774 2977–2991.
- 775 Mauvisseau, Q., Harper, L. R., Sander, M., Hanner, R. H., Kleyer, H., & Deiner, K. (2022).  
776 The multiple states of environmental DNA and what is known about their persistence  
777 in aquatic environments. *Environmental Science & Technology*, 56(9), 5322–5333.
- 778 Nagler, M., Podmirseg, S. M., Ascher-Jenull, J., Sint, D., & Traugott, M. (2022). Why eDNA  
779 fractions need consideration in biomonitoring. *Molecular Ecology Resources*, 22(7).  
780 <https://doi.org/10.1111/1755-0998.13658>
- 781 Pawlowski, J., Bruce, K., Panksep, K., Aguirre, F. I., Amalfitano, S., Apothéloz-Perret-Gentil,  
782 L., Baussant, T., Bouchez, A., Carugati, L., & Cermakova, K. (2021). Environmental  
783 DNA metabarcoding for benthic monitoring: A review of sediment sampling and  
784 DNA extraction methods. *Science of the Total Environment*, 151783.
- 785 Pietramellara, G., Franchi, M., Gallori, E., & Nannipieri, P. (2001). Effect of molecular  
786 characteristics of DNA on its adsorption and binding on homoionic montmorillonite  
787 and kaolinite. *Biology and Fertility of Soils*, 33(5), 402–409.
- 788 Pont, D., Rocle, M., Valentini, A., Civade, R., Jean, P., Maire, A., Roset, N., Schabuss, M.,  
789 Zornig, H., & Dejean, T. (2018). Environmental DNA reveals quantitative patterns of  
790 fish biodiversity in large rivers despite its downstream transportation. *Scientific*  
791 *Reports*, 8(1), 1–13.
- 792 Rees, H. C., Maddison, B. C., Middleditch, D. J., Patmore, J. R., & Gough, K. C. (2014). The  
793 detection of aquatic animal species using environmental DNA—a review of eDNA as a  
794 survey tool in ecology. *Journal of Applied Ecology*, 51(5), 1450–1459.
- 795 Rodriguez-Ezpeleta, N., Morissette, O., Bean, C. W., Manu, S., Banerjee, P., Lacoursière-  
796 Roussel, A., Beng, K. C., Alter, S. E., Roger, F., & Holman, L. E. (2021). Trade-offs  
797 between reducing complex terminology and producing accurate interpretations from

- 798 environmental DNA: Comment on “Environmental DNA: What’s behind the term?”  
799 by Pawlowski et al.,(2020). *Molecular Ecology*.
- 800 Saeki, K., Kunito, T., & Sakai, M. (2010). Effects of pH, ionic strength, and solutes on DNA  
801 adsorption by andosols. *Biology and Fertility of Soils*, 46(5), 531–535.
- 802 Sakata, M. K., Yamamoto, S., Gotoh, R. O., Miya, M., Yamanaka, H., & Minamoto, T.  
803 (2020). Sedimentary eDNA provides different information on timescale and fish  
804 species composition compared with aqueous eDNA. *Environmental DNA*, 2(4), 505–  
805 518.
- 806 Sassoubre, L. M., Yamahara, K. M., Gardner, L. D., Block, B. A., & Boehm, A. B. (2016).  
807 Quantification of environmental DNA (eDNA) shedding and decay rates for three  
808 marine fish. *Environmental Science & Technology*, 50(19), 10456–10464.
- 809 Sepulveda, A. J., Schabacker, J., Smith, S., Al-Chokhachy, R., Luikart, G., & Amish, S. J.  
810 (2019). Improved detection of rare, endangered and invasive trout in using a new  
811 large-volume sampling method for eDNA capture. *Environmental DNA*, 1(3), 227–  
812 237. <https://doi.org/10.1002/edn3.23>
- 813 Sheng, X., Qin, C., Yang, B., Hu, X., Liu, C., Waigi, M. G., Li, X., & Ling, W. (2019). Metal  
814 cation saturation on montmorillonites facilitates the adsorption of DNA via cation  
815 bridging. *Chemosphere*, 235, 670–678.
- 816 Shogren, A. J., Tank, J. L., Andruszkiewicz, E., Olds, B., Mahon, A. R., Jerde, C. L., &  
817 Bolster, D. (2017). Controls on eDNA movement in streams: Transport, Retention,  
818 and Resuspension. *Scientific Reports*, 7(1), 5065. [https://doi.org/10.1038/s41598-017-](https://doi.org/10.1038/s41598-017-05223-1)  
819 05223-1
- 820 Sodnikar, K., Parker, K. M., Stump, S. R., ThomasArrigo, L. K., & Sander, M. (2021).  
821 Adsorption of double-stranded ribonucleic acids (dsRNA) to iron (oxyhydr-) oxide  
822 surfaces: Comparative analysis of model dsRNA molecules and deoxyribonucleic  
823 acids (DNA). *Environmental Science: Processes & Impacts*, 23(4), 605–620.
- 824 Taberlet, P., Coissac, E., Hajibabaei, M., & Rieseberg, L. H. (2012). Environmental DNA.  
825 *Molecular Ecology*, 21(8), 1789–1793. [https://doi.org/10.1111/j.1365-](https://doi.org/10.1111/j.1365-294X.2012.05542.x)  
826 294X.2012.05542.x
- 827 Torti, A., Lever, M. A., & Jørgensen, B. B. (2015). Origin, dynamics, and implications of  
828 extracellular DNA pools in marine sediments. *Marine Genomics*, 24, 185–196.
- 829 Tsuji, S., Takahara, T., Doi, H., Shibata, N., & Yamanaka, H. (2019). The detection of aquatic  
830 macroorganisms using environmental DNA analysis—A review of methods for  
831 collection, extraction, and detection. *Environmental DNA*, 1(2), 99–108.
- 832 Turner, C. R., Uy, K. L., & Everhart, R. C. (2015). Fish environmental DNA is more  
833 concentrated in aquatic sediments than surface water. *Biological Conservation*, 183,  
834 93–102.
- 835 Wickham, H., Averick, M., Bryan, J., Chang, W., McGowan, L. D., François, R., Grolemond,  
836 G., Hayes, A., Henry, L., & Hester, J. (2019). Welcome to the Tidyverse. *Journal of*  
837 *Open Source Software*, 4(43), 1686.
- 838 Xu, R., Zhao, A., & Ji, G. (2003). Effect of low-molecular-weight organic anions on surface  
839 charge of variable charge soils. *Journal of Colloid and Interface Science*, 264(2), 322–  
840 326.
- 841 Ye, J., Coulouris, G., Zaretskaya, I., Cutcutache, I., Rozen, S., & Madden, T. L. (2012).  
842 Primer-BLAST: A tool to design target-specific primers for polymerase chain  
843 reaction. *BMC Bioinformatics*, 13, 134. <https://doi.org/10.1186/1471-2105-13-134>
- 844 Yu, W. H., Li, N., Tong, D. S., Zhou, C. H., Lin, C. X. (Cynthia), & Xu, C. Y. (2013).  
845 Adsorption of proteins and nucleic acids on clay minerals and their interactions: A  
846 review. *Applied Clay Science*, 80–81, 443–452.  
847 <https://doi.org/10.1016/j.clay.2013.06.003>



848 Yuan, Q.-B., Huang, Y.-M., Wu, W.-B., Zuo, P., Hu, N., Zhou, Y.-Z., & Alvarez, P. J.  
849 (2019). Redistribution of intracellular and extracellular free & adsorbed antibiotic  
850 resistance genes through a wastewater treatment plant by an enhanced extracellular  
851 DNA extraction method with magnetic beads. *Environment International*, *131*,  
852 104986.

853

854

## 855 **Acknowledgments**

856 We would like to thank Myriam Gwerder, Lukas Sommer, and Benjamin Loos for culturing  
857 mouse cells for the experiments. We thank Pascal Opiasa and Killian Zurita de Higes for  
858 collecting water matrices and assisting with the experiment. We thank Silvia Kobel for  
859 assistance with the Mosquito liquid handler. Data produced and analyzed in this paper were  
860 generated in collaboration with the Genetic Diversity Centre (GDC), ETH Zurich. This work  
861 and all co-authors have been supported by the European Research Council (ERC) under the  
862 European Union's Horizon 2020 research and innovation program (Grant Agreement No.  
863 852621).

864
